# Pediatric glioblastomas: A histopathological and molecular genetic study

Vaishali Suri, Prasenjit Das, Ayushi Jain, Mehar Chand Sharma, Sachin Anil Borkar, Ashish Suri, Deepak Gupta, and Chitra Sarkar

Departments of Pathology and Neurosurgery, All India Institute of Medical Sciences, New Delhi, India

Glioblastoma multiforme (GBM) occurs rarely in children. Relatively few studies have been performed on molecular properties of pediatric GBMs. Our objective in this study was to evaluate the genetic alterations in pediatric GBM (age  $\leq$  18 years) with special reference to p53, p16, and p27 protein expression, alterations of the epidermal growth factor receptor (EGFR), and deletion of the phosphate and tensin homolog gene (*PTEN*). Thirty cases of childhood GBMs reported between January 2002 and June 2007 were selected, and slides stained with hematoxylin and eosin were reviewed. Immunohistochemical staining was performed for EGFR, p53, p16, and p27, and tumor proliferation was assessed by calculating the MIB-1 labeling index (LI). Fluorescence in situ hybridization analysis was performed to evaluate for *EGFR* amplification and *PTEN* deletion. Histopathological features and MIB-1 LI were similar to adult GBMs. p53 protein expression was observed in 63%. Although EGFR protein overexpression was noted in 23% of cases, corresponding amplification of the *EGFR* gene was rare (5.5%). Deletion of the *PTEN* gene was also equally rare (5.5%). One case showed polysomy (chromosomal gains) of chromosomes 7 and 10. Loss of p16 and p27 immunoprotein expression was observed in 68% and 54% of cases, respectively. In pediatric de novo/primary GBMs, deletion of *PTEN* and *EGFR* amplification are rare, while p53 alterations are more frequent compared to primary adult GBMs. Frequency of loss of p16 and p27 immunoprotein expression is similar to their adult counterparts. This suggests that pediatric malignant gliomas are distinctly different from adult GBMs, highlight-

ing the need for identification of molecular targets that may be adopted for future novel therapeutic strategies. *Neuro-Oncology* 11, 274–280, 2009 (Posted to *Neuro-Oncology* [serial online], Doc. D08-00117, December 9, 2008. URL <http://neuro-oncology.dukejournals.org>; DOI: 10.1215/15228517-2008-092)

Keywords: epidermal growth factor receptor, glioblastoma multiforme, p16, p27, p53, pediatric, *PTEN*

Malignant gliomas are much rarer in children than in adults, comprising only 5%–10% of childhood intracranial neoplasms.<sup>1</sup> In adults, distinct molecular pathways have been described for the development of these tumors. The primary/de novo glioblastomas (GBMs), which typically affect older patients, are characterized by amplification of the epidermal growth factor receptor gene (*EGFR*) along with deletion or mutation of phosphate and tensin homolog tumor suppressor gene (*PTEN*), a negative regulator of the phosphatidylinositol 3 kinase/Akt signaling pathway. In contrast, secondary GBMs, which evolve from low-grade lesions and occur in younger individuals, often have mutations of the tumor suppressor gene *TP53* but only infrequently have amplification of *EGFR* or alterations of *PTEN*.<sup>2–5</sup>

Compared with the extensive work that has been performed to characterize the molecular features of adult malignant gliomas, relatively little has been reported on characterization of these features in pediatric gliomas.<sup>6</sup> A few studies have suggested some differences in the genetic pathways leading to the formation of de novo GBMs in children compared to adults.<sup>7–9</sup> In view of the ongoing efforts to apply therapeutic strategies directed at EGFR and Akt signaling pathways to the treatment of malignant glioma in adults, and the recent interest in translating such approaches to childhood tumors, we

Received March 11, 2008; accepted October 14, 2008.

Address correspondence to Chitra Sarkar, Department of Pathology, All India Institute of Medical Sciences, Mehrauli Rd., Ansari Nagar (W), New Delhi-110029, India (sarkar.chitra@gmail.com).

need a more precise understanding of the cellular and molecular basis of the disease in childhood.

Hence, we undertook this study to assess the molecular profile of pediatric primary GBMs with special reference to EGFR alterations (protein expression and gene amplification), *PTEN* deletion, and p53, p16, and p27 protein expression. Immunohistochemical staining was used to evaluate protein expression and to determine tumor proliferation by calculating the MIB-1 labeling index (LI). For molecular profiling of these tumors, fluorescence in situ hybridization (FISH) technique was applied on paraffin-embedded sections, using EGFR/CEP7 (chromosome 7 centromere probe) and PTEN/CEP10 paired commercial probes. To the best of our knowledge, this is the first FISH analysis of a representative cohort of pediatric GBMs from India.

## Materials and Methods

### Clinical Patient Data

Forty-five children ( $\leq 18$  years of age) diagnosed with glioblastomas between January 2002 and June 2007 were identified from a detailed review of the neuropathology records of the All India Institute of Medical Sciences. Age and sex of all patients were noted.

### Histopathological Examination

Thirty cases of supratentorial pediatric glioblastoma with sufficient material available in paraffin blocks were selected for further analysis. The original hematoxylin and eosin slides were reevaluated independently by two neuropathologists (C.S. and V.S.). Detailed histopathological features were noted: cellularity, pleomorphism, presence of giant cells, mitotic activity, endothelial proliferation including glomeruloid formation, and necrosis (confluent/palisading). The diagnosis was reconfirmed per the recent WHO classification.<sup>10</sup>

### Immunohistochemical Staining for p53, p16, p27, EGFR, and MIB-1

Monoclonal antibodies for p53-DO1 (1:200; Santa Cruz Biotechnology Inc., Santa Cruz, CA, USA), p16 (1:50; Neomarkers, Fremont, CA, USA), p27 (1:25; Dako, Glostrup, Denmark), EGFR-NCL (1:50; Dako), and MIB-1 (1:200; Dako) were used. Universal-labeled streptavidin biotin kit was used as the detection system (Dako).

Briefly, 5- $\mu$ m sections were cut from paraffin-embedded blocks and baked for 2 h. After deparaffinization and rehydration in descending grades of alcohol, the sections were brought to water. Sections for EGFR immunostaining were subjected to protease digestion (Dako S 3020) for 1 h. For p53, p16, p27, and MIB-1 staining, antigen retrieval was performed by transferring the sections into 0.01 M citrate buffer (pH 6.0) previously heated in a microwave oven. After washing in Tris (pH 7.6) and blocking with 3% H<sub>2</sub>O<sub>2</sub> in methanol for 30 min at room temperature (RT), the sections were

incubated overnight at 4°C with the primary antibodies. The sections were washed in Tris, treated with the biotin-labeled secondary antibody for 60 min at RT, and then washed in Tris. The sections were then incubated with tertiary antibody for 60 min at RT and washed in Tris. Sections were then stained with diaminobenzidine for 10 min, washed with distilled water, counterstained in hematoxylin for 1 min, and mounted.

Tumor cell staining for p53 and EGFR was graded as 0 if no cells stained, 1+ if 1%–10% stained, 2+ if 11%–25% stained, 3+ if 26%–50% stained, and 4+ if 51%–100% stained.<sup>8</sup> The MIB-1 LI was calculated in the highest proliferating area as percentage of labeled nuclei per 1,000 cells. Expression for p16 and p27 was evaluated as either positive or negative.

### FISH Analysis of PTEN and EGFR

In 18 of 30 cases, where sufficient material was available in the blocks, a dual-probe FISH assay was performed on paraffin-embedded sections, with locus-specific probes for EGFR and PTEN paired with centromere probes for chromosomes 7 (CEP7) and 10 (CEP10) (Vysis, Downers Grove, IL, USA), respectively. Deparaffinization of the sections was carried out with three 10-min immersions in xylene followed by two 3-min immersions in 100% ethanol. Following rinsing in water, target retrieval was achieved by immersing the slides in citrate buffer (pH 6.0) and boiling in a microwave for 20 min. Slides were digested in 0.04% pepsin (P-7000; Sigma-Aldrich, St. Louis, MO, USA) for 30 min at 37°C, fixed, and dehydrated. Probe mixture (10  $\mu$ l per slide) was applied on each section. Paired probe mixture for PTEN/CEP10 was diluted from stock with hybridization buffer and distilled water to a concentration of 1:7:2, respectively. The probe for EGFR/CEP7 was available prediluted. Simultaneous probe/specimen denaturation at 73°C for 5 min with subsequent overnight incubation at 37°C was performed in a Thermobrite hybridization chamber (Vysis). The sections were washed the next day in 2 $\times$  saline-sodium citrate (SSC; 2 min at 73°C) followed by 0.5 $\times$  SSC (2 min at RT), counterstained with 4,6-diamidino-2-phenylindole (Vysis), and visualized under a fluorescent microscope.

Signals were scored in at least 200 nonoverlapping, intact nuclei. Sections from nonneoplastic cortical tissue obtained from epilepsy surgery specimens were used as a control for each probe pair. *EGFR* amplification was considered when more than 10% of tumor cells exhibited either a EGFR:CEP7 ratio  $> 2$  or innumerable tight clusters of signals of the locus probe. Hemizygous deletions were defined as  $> 50\%$  nuclei containing either one signal of locus-targeted probe and two or more signals of reference probe (absolute deletions) or two signals of locus-targeted probe and more than four signals of reference probe (relative deletions). Homozygous deletions were identified by the simultaneous lack of both signals of locus-targeted probe and the presence of reference probe signals in more than 30% of cells. Monosomy for chromosome 10 was defined by the presence of one CEP signal per cell in  $> 50\%$ . Polysomies (chromosomal

gains) were defined as >10% of nuclei containing three or more signals for locus or CEP.<sup>7</sup>

## Results

Of 528 glioblastomas diagnosed in our neuropathology laboratory between January 1, 2002, and June 30, 2007, 45 occurred in children, constituting 8.5% of all GBMs. Ages ranged from 9 months to 18 years, with a mean of 11.2 years. There was a marked male preponderance (M:F ~ 2:1; Table 1).

The histological features of the childhood GBMs (Fig. 1a–d) were similar to those of adult GBMs in that they showed marked pleomorphism, giant cells, brisk mitotic activity, endothelial proliferation, and necrosis (confluent and pseudopalisading). The mean MIB-1 LI (Fig. 2a) was 38.6% (range, 8%–65%). p53 protein expression (Fig. 2b) was observed in 63% (19 of 30) of cases. Approximately 70% of these showed 3+ or 4+ expression. EGFR protein expression (Fig. 2c) was seen in seven (23%) cases. In approximately 85% of the

EGFR-positive cases, 3+ or 4+ expression was observed. Approximately 20% ( $n = 6$ ) of cases were double negative; that is, they did not show either p53 or EGFR staining. Positivity for both EGFR and p53 was noted in 7% of cases ( $n = 2$ ). Loss of p16 and p27 immunorexpression was observed in 68% (20) and 54% (16) of cases, respectively (Fig. 2d).

Representative results of FISH analysis are presented in Fig. 3. Of the 18 cases analyzed, *EGFR* amplification was seen in only one case (5.5%). A comparative analysis of EGFR protein expression in these 18 cases revealed overexpression in seven cases (39%). Thus, only 15% of the childhood GBM cases showing EGFR protein overexpression had concomitant *EGFR* amplification, further highlighting the fact that protein expression cannot be translated to gene amplification and thus cannot be used for molecular profiling.

*PTEN* deletion was equally rare and observed in only one case. This was a hemizygous deletion, because most cells showed only one signal for PTEN and two signals for the CEP probe. One case showed polysomies (chromosomal gains) of chromosomes 7 and 10.

**Table 1.** Summary of immunohistochemistry (IHC) and fluorescence in situ hybridization (FISH) results for each patient

| Patient No. | Age (Years)     | Sex | EGFR IHC | EGFR FISH | p53 | p16 | p27 | PTEN      |
|-------------|-----------------|-----|----------|-----------|-----|-----|-----|-----------|
| 1           | 17              | M   | 0        | No Ampl   | 4+  | P   | P   | No Del    |
| 2           | 5               | M   | 0        | NA        | 3+  | P   | P   | NA        |
| 3           | 16              | M   | 0        | NA        | 0   | N   | N   | NA        |
| 4           | 2               | M   | 0        | No Ampl   | 4+  | N   | P   | No Del    |
| 5           | 15              | F   | 0        | NA        | 0   | P   | P   | NA        |
| 6           | 10              | F   | 0        | NA        | 3+  | P   | N   | No Del    |
| 7           | 13              | F   | 0        | Ampl 1    | 0   | N   | P   | No Del    |
| 8           | 10              | M   | 2+       | No Ampl   | 1+  | N   | P   | No Del    |
| 9           | 11              | M   | 4+       | No Ampl   | 0   | N   | P   | NA        |
| 10          | 6               | F   | 0        | NA        | 4+  | N   | P   | NA        |
| 11          | 3               | M   | 0        | No Ampl   | 0   | N   | N   | No Del    |
| 12          | 5               | M   | 0        | No Ampl   | 2+  | N   | N   | No Del    |
| 13          | 14              | F   | 0        | NA        | 1+  | N   | N   | No Del    |
| 14          | 3               | M   | 3+       | No Ampl   | 4+  | P   | P   | No Del    |
| 15          | 15              | M   | 3+       | No Ampl   | 0   | N   | P   | NA        |
| 16          | 14              | M   | 0        | NA        | 4+  | P   | P   | NA        |
| 17          | 14              | F   | 0        | NA        | 4+  | P   | N   | NA        |
| 18          | 13              | F   | 0        | NA        | 3+  | P   | N   | NA        |
| 19          | 11              | M   | 0        | NA        | 4+  | P   | P   | NA        |
| 20          | 8               | F   | 0        | NA        | 3+  | N   | N   | NA        |
| 21          | 12              | M   | 0        | NA        | 4+  | N   | N   | NA        |
| 22          | 3               | M   | 0        | No Ampl   | 0   | N   | P   | Del+      |
| 23          | 17              | M   | 0        | No Ampl   | 2+  | N   | N   | No Del    |
| 24          | 15              | M   | 0        | No Ampl   | 3+  | N   | N   | No Del    |
| 25          | 18              | M   | 4+       | No Ampl   | 0   | N   | P   | No Del    |
| 26          | 0.75 (9 months) | M   | 0        | No Ampl   | 0   | N   | N   | No Del    |
| 27          | 17              | M   | 0        | No Ampl   | 4+  | P   | N   | No Del    |
| 28          | 5               | F   | 4+       | No Ampl   | 0   | N   | N   | No Del    |
| 29          | 16              | M   | 0        | No Ampl   | 1+  | N   | N   | No Del    |
| 30          | 12              | M   | 4+       | Aneuploid | 0   | N   | N   | Aneuploid |

Abbreviations: EGFR, epidermal growth factor receptor; *PTEN*, phosphate and tensin homolog gene; M, male; Ampl, amplification; P, positive; Del, deletion; NA, not available; N, negative; F, female.

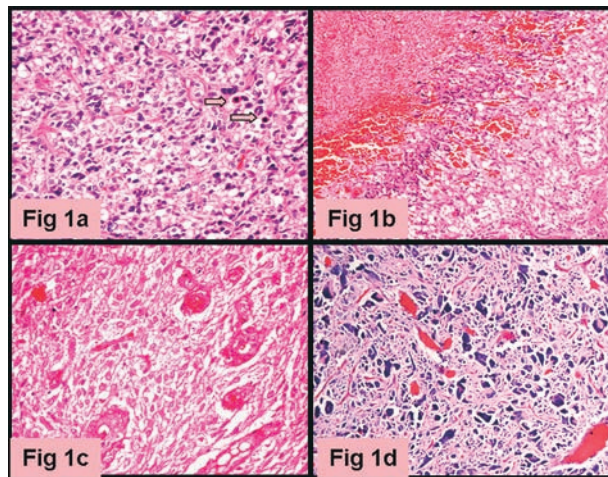

Fig. 1. Hematoxylin and eosin staining. (a) Photomicrograph of a glioblastoma showing brisk mitotic activity. (b) Typical palisading necrosis. (c) Glioblastoma with endothelial proliferation. (d) A case showing bizarre multinucleated tumor giant cells. Original magnification,  $\times 200$  for a–d.

## Discussion

Childhood glioblastomas are extremely rare compared with their adult counterparts.<sup>10</sup> These tumors comprised 8.52% of all glioblastomas diagnosed in our department in the last 5.5 years.

The molecular genetics of adult GBMs has been intensely studied over the past years.<sup>10</sup> They commonly demonstrate amplification of *EGFR*,<sup>2–5</sup> which encodes a tyrosine kinase involved in cell replication, and inactivation by mutation or deletion of *PTEN*, a negative regulator of phosphatidylinositol 3 kinase/Akt signaling.<sup>11–14</sup> In contrast, secondary adult malignant gliomas that evolve from low-grade lesions generally affect young adults and often have mutations in *TP53*, which encodes the p53 protein, but only infrequently have amplification of *EGFR* or alterations of *PTEN*.<sup>2–5</sup> The identification of high-frequency gene alterations in these tumors has motivated substantial efforts toward evaluating related hypotheses involving targeted therapies.

In adult malignant gliomas, various therapeutic strategies have been developed to interfere with Akt-mediated signal transduction, which is derepressed by the loss of *PTEN*, and to block the EGFR tyrosine kinase and diminish downstream signaling from this receptor. In addition, antibody- and ligand-mediated therapeutic agents, such as immunotoxins and radioimmunoconjugates, are being targeted to tumor cells that overexpress EGFR.<sup>15</sup> Given the potential of these new strategies, there has been significant interest in assessing their efficacy in treating malignant gliomas in children. However, the extent of similarity between genetic pathways of malignant gliomas in children and adults is largely unknown, and the rationale for applying therapeutic approaches used for the treatment of malignant gliomas in adults to corresponding tumors in pediatric patients therefore lacks justification.

Only a few studies have addressed the chromosomal and genetic alteration in childhood glioblastomas

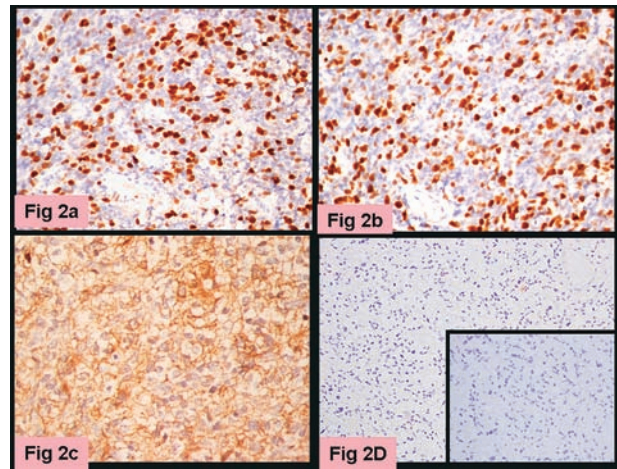

Fig. 2. Immunohistochemical staining. (a) A case showing very high proliferation activity as demonstrated by immunoreactivity to MIB-1. (b) Immunohistochemistry for p53 showing strong (4+) nuclear immunoreactivity. (c) Diffuse membranous expression of epidermal growth factor receptor in tumor cells. (d) A case showing loss of expression (negativity) of p16 protein. (Inset) Same case showing negativity for p27 protein. Original magnification:  $\times 200$  for a–c and d inset;  $\times 100$  for d.

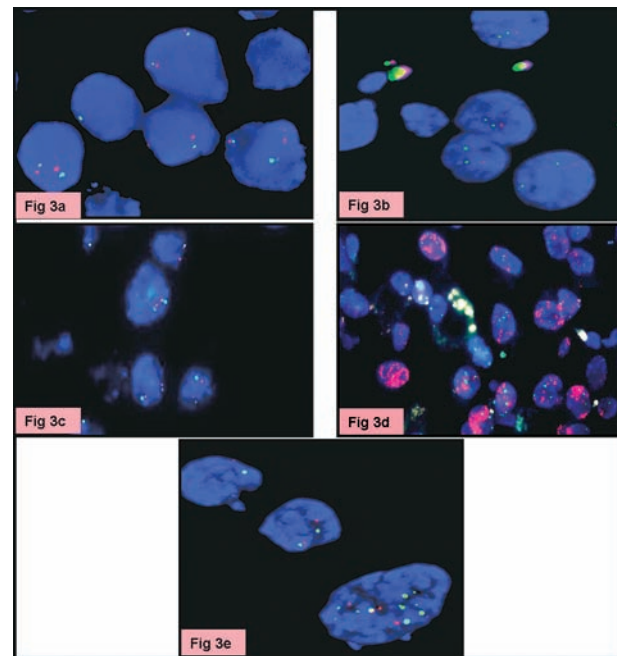

Fig. 3. Fluorescence in situ hybridization analysis. (a) A case with tumor cells expressing normal phosphatase and tensin homolog protein (*PTEN*; two red signals per cell) and CEP10 (two green signals per cell). (b) Photomicrograph of a tumor showing hemizygous deletion of 10q23/*PTEN* locus: a single red signal in most of the tumor nuclei (*PTEN*) and paired green signals for CEP10. (c) Normal *EGFR*/CEP7 expression (two red and two green signals in most of the tumor cells). (d) Section from a tumor showing *EGFR* amplification. Innumerable red signals (*EGFR*) are seen compared to few green signals (CEP7). (e) Section of a tumor showing polysomies (chromosomal gain). Original magnification,  $\times 1,000$  for a–e.

because of low incidence. Recent institutional pilot studies and multiinstitutional analyses have indicated that malignant gliomas arising in children have molecular features and prognostic correlates that are distinct from those in adults.<sup>16–20</sup> These observations have important implications for the translation of therapies from adult to pediatric gliomas.

In the present study, we analyzed the molecular profile of childhood GBMs in terms of EGFR, p53, p16, and p27 protein expression and assessed the status of EGFR amplification and PTEN deletion. MIB-1 LI was also evaluated.

It has been postulated previously that EGFR amplification is much less common in pediatric glioblastomas compared to adult primary glioblastomas. EGFR amplification occurs in approximately 35%–50% of adult primary glioblastomas.<sup>21,22</sup> Only one case in the present study showed EGFR amplification. This case also showed a very high EGFR protein expression (4+). Some other studies found no EGFR amplifications among pediatric glioblastomas,<sup>23–26</sup> and others found amplification in very few cases.<sup>27,28</sup> On the other hand, the reports on EGFR protein expression have been quite varied. Sure et al.<sup>29</sup> reported EGFR overexpression in only 2 of 20 cases (10%). Similar observations were made by Cheng et al.,<sup>23</sup> who found only very small foci of tumor cells showing EGFR immunopositivity in 4 of 13 glioblastomas. On the other hand, Bredel et al.<sup>28</sup> reported elevated immunoreactivity for EGFR in 80% of high-grade nonbrainstem gliomas. Such a large disparity could be due to variation in types of antibodies used, antigen retrieval timings, protocols followed, and methods of fixation.

In the present series, 23% of cases showed EGFR protein expression. Despite the infrequency of EGFR amplification, the overexpression of EGFR protein observed could be due to upregulation of receptor expression by mechanisms other than amplification.

PTEN mutations have been detected by different techniques in 15% to more than 40% of GBMs from adult patients.<sup>13,30,31</sup> The data reported on PTEN alterations in pediatric malignant gliomas are variable. Cheng et al.<sup>23</sup> found PTEN mutations in only 8% of pediatric high-grade gliomas, while Rasheed et al.<sup>32</sup> did not detect any PTEN mutation in 22 childhood gliomas of all grades. Raffel et al.<sup>33</sup> detected PTEN mutations in 3 of 15 pediatric GBMs (20%), which was the only alteration significantly associated with decreased survival in their study group. Sung et al.<sup>34</sup> reported on homozygous PTEN deletions in 2 of 28 pediatric high-grade astrocytomas. Kraus et al.<sup>35</sup> found PTEN mutation in one of six cases. We observed PTEN deletion in only 5.5% of cases.

Regulation of proliferative activity and cell cycle progression depends on sequential activation of a set of cyclin-dependent kinases (CDKs).<sup>36</sup> Two families of tumor suppressor genes, Cip/Kip (*p21*, *p27*, and *p57*) and INK4 (*p15*, *p16*, *p18*, and *p19*), regulate cell proliferation and neoplastic transformation. It has been well established that in adult astrocytomas the expression of CDK inhibitors p16 and p27 decreases with increasing tumor grades. Loss of p16 immunoreactivity was seen in approximately 57% of adult glioblastomas in a

study by Ranunolo et al.<sup>37</sup> Further, lack of p16 protein expression due to homozygous gene deletion or mutation is associated with poor survival.<sup>38</sup> Regulation of p27 occurs primarily at the posttranslational level by ubiquitin-mediated degradation.<sup>39</sup> Decreased levels of p27 are associated with a poor prognosis and short survival.<sup>40,41</sup> Very few studies have evaluated CDK inhibitors in pediatric GBMs. Sure et al.<sup>29</sup> detected loss of p16 expression in 61% of pediatric glioblastomas. In the present study, loss of p16 and p27 immunoreactivity was observed in 68% and 54% of cases, respectively, which is similar to that observed in adult GBMs.

Pediatric high-grade gliomas resemble the pattern seen in adult secondary GBMs with regard to p53 overexpression, which is often used as a surrogate indicator of alterations on TP53 gene functional status. TP53 mutations are the genetic hallmark of secondary glioblastoma and are significantly less frequent. In a study by Watanabe et al.,<sup>5</sup> the incidence of p53 protein accumulation (nuclear immunoreactivity to PAb 1801 polyclonal antibody) was lower in primary (~25%) than in secondary (>65%) glioblastomas. Similar trends have been observed in recent studies.<sup>5,42,43</sup> p53 protein expression was seen in 63% of our cases. Similar observations have been made by previous authors. Cheng et al.<sup>23</sup> documented p53 protein accumulation in 75% of high-grade childhood gliomas, and p53 mutation in 38%. Pollack et al.<sup>18</sup> documented increased expression of p53 in about 35% of high-grade gliomas in children, which increased to 58% when only glioblastomas were considered. The authors determined that this feature was an adverse prognostic factor in a cohort of children who were treated uniformly with surgery, radiotherapy, and chemotherapy. The frequency of p53 mutations was 33%, which is more in line with the frequency of such mutations in the secondary malignant gliomas that affect young adults.<sup>5,24,44</sup>

To conclude, childhood de novo/primary GBMs resemble their adult counterparts with regard to clinical history: they show no evidence of previous low-grade astrocytoma, and they share similar histomorphological features. However, the patterns of genetic alterations in pediatric primary GBMs appear to be distinct from those in adult GBMs. In our cases, alterations of PTEN and amplification of EGFR were uncommon. A large majority of cases showed p53 protein expression. Loss of p16 and p27 expression was observed in a significant number of cases. More such studies with proper follow-up data are needed in deciding if extrapolations from the study of adult astrocytomas can be implemented for glioma therapies in children. Further, determination of both the similarities and differences between pediatric and adult astrocytomas will aid in the development of targeted, individualized therapies that will be of benefit to all individuals afflicted with this type of cancer.

## Acknowledgments

We thank the Indian Council of Medical Research for providing us the financial grant and Dr. G.K. Rath of the Institute Rotary Cancer Hospital for allowing us to use its fluorescence microscope and photography system.

## References

- Pollack IF. Current concepts: Brain tumors in children. *N Engl J Med*. 1994;331:1500–1507.
- Galanis E, Buckner J, Kimmell D, et al. Gene amplification as a prognostic factor in primary and secondary high-grade malignant gliomas. *Int J Oncol*. 1998;13:717–724.
- He J, Olson JJ, James CD. Lack of p16INK4 or retinoblastoma protein (pRb), or amplification-associated overexpression of cdk4 is observed in distinct subsets of malignant glial tumors and cell lines. *Cancer Res*. 1995;55:4833–4836.
- Reifenberger G, Collins VP. Pathology and molecular genetics of astrocytic gliomas. *J Mol Med*. 2004;82:656–670.
- Watanabe K, Tachibana O, Sato K, Yonekawa Y, Kleihues P, Ohgaki H. Overexpression of the EGF receptor and p53 mutations are mutually exclusive in the evolution of primary and secondary glioblastomas. *Brain Pathol*. 1996;6:217–224.
- Nakamura M, Shimada K, Ishida E, et al. Molecular pathogenesis of pediatric astrocytic tumors. *Neuro-Oncology*. 2007;9:113–123.
- Korshunov A, Sycheva R, Gorelyshev S, Golanov A. Clinical utility of fluorescence in situ hybridization (FISH) in nonbrainstem glioblastomas of childhood. *Mod Pathol*. 2005;18:1258–1263.
- Brat DJ, Shehata BM, Castellano-Sanchez AA, et al. Congenital glioblastoma: A clinicopathologic and genetic analysis. *Brain Pathol*. 2007;17:276–281.
- Ganigi PM, Santosh V, Anandh B, Chandramouli BA, Sastry Kolluri VR. Expression of p53, EGFR, pRb and bcl-2 proteins in pediatric glioblastoma multiforme: A study of 54 patients. *Pediatr Neurosurg*. 2005;41:292–299.
- Kleihues P, Burger PC, Aldape KD, Brat DJ, Biernat W, Bigner DD. Glioblastoma. In: Louis DN, Ohgaki H, Wiestler OD, Cavenee WK, eds. *WHO Classification of Tumours of the Central Nervous System*. Lyon, France: IARC Press; 2007:33–49.
- Ino Y, Betensky RA, Zlatescu MC, et al. Molecular subtypes of anaplastic oligodendroglioma: Implications for patient management at diagnosis. *Clin Cancer Res*. 2001;7:839–845.
- Li J, Yen C, Liaw D, et al. *PTEN*, a putative protein tyrosine phosphatase gene mutated in human brain, breast, and prostate cancer. *Science*. 1997;275:1943–1947.
- Schmidt EE, Ichimura K, Goike HM, Moshref A, Liu L, Collins VP. Mutational profile of the *PTEN* gene in primary human astrocytic tumors and cultivated xenografts. *J Neuropathol Exp Neurol*. 1999;58:1170–1183.
- Steck PA, Pershouse MA, Jasser SA, et al. Identification of a candidate tumor suppressor gene, *MMAC1*, at chromosome 10q23.3 that is mutated in multiple advanced cancers. *Nat Genet*. 1997;15:356–362.
- Sampson JH, Akabani G, Archer GE, et al. Progress report of a phase I study of the intracerebral microinfusion of a recombinant chimeric protein composed of transforming growth factor (TGF)-alpha and a mutated form of the *Pseudomonas* exotoxin termed PE-38 (TP-38) for the treatment of malignant brain tumors. *J Neurooncol*. 2003; 65:27–35.
- Pollack IF, Boyett JM, Yates AJ, et al. The influence of central review on outcome associations in childhood malignant gliomas: Results from the CCG-945 experience. *Neuro-Oncology*. 2003;5:197–207.
- Pollack IF, Finkelstein SD, Burnham J, et al. The association between chromosome 1p and 19q loss and outcome in pediatric malignant gliomas: Results from the CCG-945 cohort. *Pediatr Neurosurg* 2003; 39:114–121.
- Pollack IF, Finkelstein SD, Woods J, et al. Expression of p53 and prognosis in children with malignant gliomas. *N Engl J Med*. 2002;346:420–427.
- Pollack IF, Hamilton RL, Burnham J, et al. The impact of proliferation index on outcome in childhood malignant gliomas: Results in a multi-institutional cohort. *Neurosurgery*. 2002;50:1238–1245.
- Pollack IF, Hamilton RL, James CD, et al. Children's Oncology Group. Rarity of *PTEN* deletions and *EGFR* amplification in malignant gliomas of childhood: Results from the Children's Cancer Group 945 cohort. *J Neurosurg*. 2006;105(suppl):418–424.
- Ohgaki H, Dessen P, Jourde B, et al. Genetic pathways to glioblastoma: A population-based study. *Cancer Res*. 2004;64:6892–6899.
- Ekstrand AJ, Sugawa N, James CD, Collins VP. Amplified and rearranged epidermal growth factor receptor genes in human glioblastomas reveal deletions of sequences encoding portions of the N- and/or C-terminal tails. *Proc Natl Acad Sci USA*. 1992;89:4309–4313.
- Cheng Y, Ng HK, Zhang SF, et al. Genetic alterations in pediatric high-grade astrocytomas. *Hum Pathol* 1999;30:1284–1290.
- Ichimura K, Bolin MB, Goike HM, Schmidt EE, Moshref A, Collins VP. Deregulation of the p14ARF/MDM2/p53 pathway is a prerequisite for human astrocytic gliomas with G1-S transition control gene abnormalities. *Cancer Res*. 2000;60:417–424.
- James CD, Carlom E, Dumanski JP, et al. Clonal genomic alterations in glioma malignancy stages. *Cancer Res*. 1988;48:5546–5551.
- Jaros E, Perry RH, Adam L, et al. Prognostic implications of p53 protein, epidermal growth factor receptor, and Ki-67 labeling in brain tumors. *Br J Cancer*. 1992;66:373–385.
- Di Sapio A, Morra I, Pradotto L, Guido M, Schiffer D, Mauro A. Molecular genetic changes in a series of neuroepithelial tumors of childhood. *J Neurooncol*. 2002;59:117–122.
- Bredel M, Pollack IF, Hamilton RL, James CD. Epidermal growth factor receptor expression and gene amplification in high-grade non-brainstem gliomas of childhood. *Clin Cancer Res*. 1999;5:1786–1792.
- Sure U, Ruedi D, Tachibana O, et al. Determination of p53 mutations, EGFR overexpression, and loss of p16 expression in pediatric glioblastomas. *J Neuropathol Exp Neurol*. 1997;56:782–789.
- Boström J, Cobbers JMML, Wolter M, et al. Mutation of the *PTEN* (*MMAC1*) tumor suppressor gene in a subset of glioblastomas but not in meningiomas with loss of chromosome arm 10q. *Cancer Res*. 1998;58:29–33.
- Duerr E-M, Rollbrocker B, Hayashi Y, et al. *PTEN* mutations in gliomas and glioneuronal tumors. *Oncogene*. 1998;16:2259–2264.
- Rasheed BK, Stenzel TT, McLendon RE, et al. *PTEN* gene mutations are seen in high-grade but not low-grade gliomas. *Cancer Res*. 1997;57:4187–4190.
- Raffel C, Frederick L, O'Fallon JR, et al. Analysis of oncogene and tumor suppressor gene alterations in pediatric malignant astrocytomas reveals reduced survival for patients with *PTEN* mutations. *Clin Cancer Res*. 1999;5:4085–4090.
- Sung T, Miller DC, Hayes RL, Alonso M, Yee H, Newcomb EW. Preferential inactivation of the p53 tumor suppressor pathway and lack of *EGFR* amplification distinguish de novo high-grade pediatric astrocytomas from de novo adult astrocytomas. *Brain Pathol*. 2000;10:249–259.
- Kraus JA, Felsberg J, Tonn JC, Reifenberger G, Pietsch T. Molecular genetic analysis of the *TP53*, *PTEN*, *CDKN2A*, *EGFR*, *CDK4* and *MDM2* tumour-associated genes in supratentorial primitive neuro-

- ectodermal tumours and glioblastomas of childhood. *Neuropathol Appl Neurobiol.* 2002;28:325–333.
36. Leenstra S, Oskam NT, Bijleveld EH, Bosch DA, Troost D, Hulsebos TJ. Genetic sub-types of human malignant astrocytoma correlate with survival. *Int J Cancer.* 1998;79:159–165.
  37. Ranuncolo SM, Varela M, Morandi A, et al. Prognostic value of Mdm2, p53 and p16 in patients with astrocytomas. *J Neurooncol.* 2004;68:113–121.
  38. Kirla RM, Salminen EK, Huhtala S, et al. Prognostic value of the expression of tumor suppressor genes p53, p21, p16 and pRb, and Ki-67 labelling in high grade astrocytomas treated with radiotherapy. *J Neurooncol.* 2000;46:71–80.
  39. Pagano M, Tam SW, Theodoras AM, et al. Role of the ubiquitin-proteasome pathway in regulating abundance of the cyclin-dependent kinase inhibitor p27. *Science.* 1995;269:682–685.
  40. Kirla RM, Haapasalo HK, Kalimo H, Salminen EK. Low expression of p27 indicates a poor prognosis in patients with high-grade astrocytomas. *Cancer.* 2003;97:644–648.
  41. Mizumatsu S, Tamiya T, Ono Y, et al. Expression of cell cycle regulator p27Kip1 is correlated with survival of patients with astrocytoma. *Clin Cancer Res.* 1999;5:551–557.
  42. Yoon KS, Lee MC, Kang SS, et al. P53 mutation and epidermal growth factor receptor overexpression in glioblastoma. *J Korean Med Sci.* 2001;16:481–488.
  43. Ohgaki H, Kleihues P. Genetic pathways to primary and secondary glioblastoma. *Am J Pathol.* 2007;170:1445–1453.
  44. Rasheed BKA, McLendon RE, Herndon JE, et al. Alterations of the TP53 gene in human gliomas. *Cancer Res.* 1994;54:1324–1330.
